# Supplementary material for: FOXQ1 Regulates Epithelial-Mesenchymal Transition in Human Cancers
Source: Oxford University Press journal article supplement (doi:10.1158/0008-5472.can-10-2787), 2011-02-23
Supplement: 00085472can102787-sup-stab_2.xls [file 00085472can102787-sup-stab_2.xls]

## Sheet: HMLER UP+MB231 DOWN
Table S2 63 genes upregulated by FOXQ1
ProbeID	Accession	Symbol ( HMLER 5fold up )	Fold change([b_HMLER FOXQ1] vs [a_HMLER PMN]) ( HMLER 5fold up )	Regulation([b_HMLER FOXQ1] vs [a_HMLER PMN]) ( HMLER 5fold up )	[a_HMLER PMN](raw) ( HMLER 5fold up )	[b_HMLER FOXQ1](raw) ( HMLER 5fold up )	Symbol ( MB231 5fold down )	Fold change([g_MB231 shFOXQ1 C17] vs [f_MB231 shRNA NC]) ( MB231 5fold down )	Regulation([g_MB231 shFOXQ1 C17] vs [f_MB231 shRNA NC]) ( MB231 5fold down )	[f_MB231 shRNA NC](raw) ( MB231 5fold down )	[g_MB231 shFOXQ1 C17](raw) ( MB231 5fold down )	[a_HMLER PMN](raw)	[b_HMLER FOXQ1](raw)	[f_MB231 shRNA NC](raw)	[g_MB231 shFOXQ1 C17](raw)	[a_HMLER PMN](normalized)	[b_HMLER FOXQ1](normalized)	[f_MB231 shRNA NC](normalized)	[g_MB231 shFOXQ1 C17](normalized)	Symbol	Entrez_Gene_ID	Definition	Ontology_Process	Ontology_Component	Ontology_Function	Chromosome	Chromosome Start Index(Avadis)	Chromosome End Index(Avadis)	Probe_Sequence
360379	NM_194435.1	VIP	5.3	up	-14.5	5.3	VIP	5.67213	down	34.6	6.1	-14.5	5.3	34.6	6.1	0	2.40599	5.1127	2.60881	VIP	7432	Homo sapiens vasoactive intestinal peptide (VIP), transcript variant 2, mRNA.	GO:0007267|GO:0006936|GO:0007589|GO:0007186|GO:0008284	GO:0005576|GO:0005625	GO:0005179|GO:0005184	chr6	153122345	153122394	AGGAGAACGACCCCTGCTTCTGACACTGAAACTTCCCTTTCTGCTTGTGT
2490152	NM_001040092.1	ENPP2	6.8	up	-1.7	6.8	ENPP2	6.8	down	6.8	-2.6	-1.7	6.8	6.8	-2.6	-1.38277	1.38277	1.38277	-1.38277	ENPP2	5168	Homo sapiens ectonucleotide pyrophosphatase/phosphodiesterase 2 (autotaxin) (ENPP2), transcript variant 2, mRNA.	GO:0009117|GO:0006796|GO:0006928|GO:0006935|GO:0007186	GO:0005886|GO:0005887	GO:0004551|GO:0016787|GO:0003676|GO:0004528|GO:0008134|GO:0004519	chr8	120639027	120639076	CATGAAGATGCACACAGCTAGGGTGCGTGACATTGAACATCTCACCAGCC
3780358	NM_138337.4	CLEC12A	10.5	up	-1.1	10.5	CLEC12A	12.3	down	12.3	-0.5	-1.1	10.5	12.3	-0.5	-3.25667	0.135651	0.36392	-3.25667	CLEC12A	160364	Homo sapiens C-type lectin domain family 12, member A (CLEC12A), transcript variant 1, mRNA.			GO:0004872|GO:0005529|GO:0004872|GO:0005529	chr12	10029119	10029168	GAACCCTGGAGGAAGAGGAAGTCCATTCAGATAGTTGTGGGGGGCCTTCG
7050477	NM_207482.1	FLJ44048	7.3	up	-4.8	7.3	FLJ44048	21	down	21	-9.5	-4.8	7.3	21	-9.5	0	2.8679	4.39232	0	FLJ44048	401024	Homo sapiens FLJ44048 protein (FLJ44048), mRNA.	GO:0006350		GO:0003899|GO:0003677	chr2	186406159	186406208	CCAGATCTTCCTCACCAGCTCACCAGGATGAACACTGAAGCTTTTGTACC
2070543	NM_025258.1	C6orf27	11.3	up	-2.5	11.3	C6orf27	10.3	down	10.3	0.3	-2.5	11.3	10.3	0.3	-3.2831	0.215148	0.0814693	-3.2831	C6orf27	80737	Homo sapiens chromosome 6 open reading frame 27 (C6orf27), mRNA.	GO:0000004	GO:0008372	GO:0005554	chr6	31841811	31842047	TAGGACTTTCGTCAACCCCAGCTTCTCCCTCACCTCCAACCTCTCCAGGG
1340239	NM_001034853.1	RPGR	7.6	up	-7	7.6	RPGR	7.7	down	7.7	-10.9	-7	7.6	7.7	-10.9	-2.75548	0.170518	0.189377	-2.75548	RPGR	6103	Homo sapiens retinitis pigmentosa GTPase regulator (RPGR), transcript variant C, mRNA.	GO:0007601|GO:0006886	GO:0005794	GO:0005515|GO:0005085	chrX	38028973	38029022	GGCAAAGGTACTCATTGGGCCTCAGTTTCTTCATCTCTAAAATGGAGTGG
7570255	NM_207355.2	POTE15	8.8	up	0	8.8	POTE15	8.2	down	8.2	-4.9	0	8.8	8.2	-4.9	-2.84549	0.292016	0.190136	-2.84549	POTE15	339010	Homo sapiens protein expressed in prostate, ovary, testis, and placenta 15 (POTE15), mRNA.				chr15	19315803	19315852	GCCAGTGCTGGCAATGGTGATGATGGATTAATTCCACAAAGGAAGAGCAG
5390747	NM_000347.4	SPTB	7.8	up	-0.4	7.8	SPTB	20.1	down	20.1	-3.5	-0.4	7.8	20.1	-3.5	-3.1779	-0.214422	1.15123	-3.1779	SPTB	6710	Homo sapiens spectrin, beta, erythrocytic (includes spherocytosis, clinical type I) (SPTB), transcript variant 2, mRNA.	GO:0051016	GO:0043234|GO:0005856|GO:0005624|GO:0016020|GO:0008091	GO:0051015|GO:0005200|GO:0003779|GO:0005515	chr14	64303262	64303812	AAGAACGCCAGATTGCAGAGAGACCCGCAGAGGAGACTGGGCCTCAAGAG
7100121	NM_006895.2	HNMT	49.2	up	1	49.2	HNMT	6.76565	down	378.2	55.9	1	49.2	378.2	55.9	-4.66604	0.954546	3.89696	1.13874	HNMT	3176	Homo sapiens histamine N-methyltransferase (HNMT), transcript variant 1, mRNA.	GO:0007585		GO:0046539|GO:0008168|GO:0016740	chr2	138490222	138490271	TGTTGTGGATCTCTCAGTGTTTAACATGGTGCCTTGCATATGGTAAATGC
5700477	NM_024563.2	FLJ14054	240.6	up	0.6	240.6	FLJ14054	9.4	down	9.4	0.7	0.6	240.6	9.4	0.7	-5.33288	2.57761	-2.10022	-5.33288	FLJ14054	79614	Homo sapiens hypothetical protein FLJ14054 (FLJ14054), mRNA.				chr5	32827158	32827207	GGGATAGACCTTGTGACAGACCAATTCTGTGACCCCTGTCTTCTGGGTCA
4040735	NM_001012418.1	LOC340156	5.6	up	-3.4	5.6	LOC340156	21.1	down	21.1	-9.7	-3.4	5.6	21.1	-9.7	-1	1.48543	3.39917	-1	LOC340156	340156	Homo sapiens hypothetical protein LOC340156 (LOC340156), mRNA.	GO:0006468		GO:0004672|GO:0000166|GO:0004674|GO:0016740|GO:0005524	chr6	2609116	2609165	CAACCACTACTACCCATTCAGAAGAGCAGAAAGCATCTGCTGTGTGAGCG
7150019	NM_015441.1	OLFML2B	5.2	up	-4.8	5.2	OLFML2B	9.61039	down	74	7.7	-4.8	5.2	74	7.7	-1.18926	1.18926	5.0202	1.7556	OLFML2B	25903	Homo sapiens olfactomedin-like 2B (OLFML2B), mRNA.		GO:0016020	GO:0016524	chr1	160219794	160219843	TGACCAGTAACCACCTTCCTTCAAGCCTTCAGCCCCTCCAGCTCCAAGTC
6130162	NM_002313.5	ABLIM1	12.8	up	-0.6	12.8	ABLIM1	28.3	down	28.3	-1.8	-0.6	12.8	28.3	-1.8	-3.52829	0.14978	1.29444	-3.52829	ABLIM1	3983	Homo sapiens actin binding LIM protein 1 (ABLIM1), transcript variant 1, mRNA.	GO:0007601|GO:0007010	GO:0015629	GO:0008270|GO:0046872|GO:0003779|GO:0005515	chr10	116407815	116407864	GCCAGGGGCTCGAACAGAAAGAGACTGATTGTTGAGGACCGGAGGGTCTC
6510491	NM_001005285.1	OR2AT4	7.3	up	-1.9	7.3	OR2AT4	6.2	down	6.2	-2.9	-1.9	7.3	6.2	-2.9	-1.50539	1.36251	1.12688	-1.50539	OR2AT4	341152	Homo sapiens olfactory receptor, family 2, subfamily AT, member 4 (OR2AT4), mRNA.				chr11	74477688	74477737	TGTCCACATCCTGGCCTCAGTGCTTCGCATCAGTTCCCTAGAAGGACGGG
1450161	NM_206966.1	MGC23985	9.07031	up	38.4	348.3	MGC23985	10.1158	down	882.1	87.2	38.4	348.3	882.1	87.2	-2.21216	0.968989	2.3096	-1.02894	MGC23985	389336	Homo sapiens similar to AVLV472 (MGC23985), mRNA.				chr5	147261438	147261487	GGCAAAGACCCAAAGCCAGACTTCCCCAAATTCCTAAGCCTCCTGGGCAC
1710692	NM_015011.1	MYR8	7.5	up	0.5	7.5	MYR8	14.9	down	14.9	-7.7	0.5	7.5	14.9	-7.7	-2.29007	0.616818	1.60717	-2.29007	MYR8	23026	Homo sapiens myosin XVI (MYO16), mRNA.		GO:0016459	GO:0005524|GO:0003774	chr13	108658084	108658133	CAAATGAGCACGCTGCCATGTACTGGTTTGAGCAGTAGGGGCTGCATCGC
4890100	NM_152545.1	RASGEF1B	6.3	up	-2.5	6.3	RASGEF1B	14.3	down	14.3	0.4	-2.5	6.3	14.3	0.4	-2.72097	-0.0656221	1.11697	-2.72097	RASGEF1B	153020	Homo sapiens RasGEF domain family, member 1B (RASGEF1B), mRNA.	GO:0051056|GO:0051301	GO:0005622	GO:0005085	chr4	82567428	82567477	CCCCCCGTTTAGATCCCAAACCTTAGCTCAACCAGTATTGCCAGAGAGGG
540600	NM_153827.3	MINK1	19.9	up	0.1	19.9	MINK1	21.3	down	21.3	-5	0.1	19.9	21.3	-5	-3.71179	0.602908	0.700992	-3.71179	MINK1	50488	Homo sapiens misshapen-like kinase 1 (zebrafish) (MINK1), transcript variant 3, mRNA.	GO:0007243|GO:0007275|GO:0006950|GO:0006468|GO:0007254		GO:0016740|GO:0005083|GO:0000166|GO:0005524|GO:0004674				CATGACTCTGAACCGTAACTGCATCATGAACTGGTGACGGGGCCCTGGGC
5420196	NM_001525.1	HCRTR1	6	up	-12.1	6	HCRTR1	6.4	down	6.4	-2.2	-12.1	6	6.4	-2.2	0	2.58496	2.67807	0	HCRTR1	3061	Homo sapiens hypocretin (orexin) receptor 1 (HCRTR1), mRNA.	GO:0007268|GO:0007218|GO:0007165|GO:0007631	GO:0005887|GO:0016020	GO:0016499|GO:0004872|GO:0001584	chr1	31863272	31864992	CGCTGCCAACCCCATCATCTACAACTTCCTCAGTGGCAAATTCCGGGAGC
50678	NM_001001584.1	PDE9A	10.1	up	-2.7	10.1	PDE9A	12.7	down	12.7	-1.4	-2.7	10.1	12.7	-1.4	0	3.33628	3.66676	0	PDE9A	5152	Homo sapiens phosphodiesterase 9A (PDE9A), transcript variant 19, mRNA.	GO:0007165		GO:0047555|GO:0030145|GO:0016787|GO:0046872	chr21	43017763	43017812	AAGAGCGGTTCCGTGAGCCCACTGTGCTGAGTCACATATATTCCATCGGT
3400372	NM_006902.3	PRRX1	7.4	up	-0.1	7.4	PRRX1	5.34146	down	21.9	4.1	-0.1	7.4	21.9	4.1	-3.12605	-0.238524	1.32681	-1.09043	PRRX1	5396	Homo sapiens paired related homeobox 1 (PRRX1), transcript variant pmx-1a, mRNA.	GO:0006355|GO:0007275	GO:0005634	GO:0003713|GO:0043565|GO:0003700	chr1	168966044	168966093	CCTCGTCCCTCCCAAGATGTTGTTTACACGAGGGGCTTCATAACGGATTC
3170167	NM_152717.1	MGC35295	13.2	up	-7.5	13.2	MGC35295	17.7	down	17.7	-11.3	-7.5	13.2	17.7	-11.3	-0.0687518	3.65371	4.07693	-0.0687518	MGC35295	219995	Homo sapiens hypothetical protein MGC35295 (MGC35295), mRNA.	GO:0007165	GO:0016021	GO:0004872	chr11	60300600	60300649	ACTCCCTTCCCCACCCCCATAGCCCAAGGACAAGGCTACCACAGAAGGTT
2570402	NM_004522.1	KIF5C	8.5	up	1.8	15.3	KIF5C	14.3	down	14.3	-7.3	1.8	15.3	14.3	-7.3	-2.5094	0.578062	0.480546	-3.3574	KIF5C	3800	Homo sapiens kinesin family member 5C (KIF5C), mRNA.	GO:0007018|GO:0006996	GO:0005875|GO:0005874|GO:0005871	GO:0005524|GO:0003777|GO:0000166|GO:0005515				CTATAGTCCATGTAACAAAAGATCTGGAAGTCACCCTCCTCTGGCCCACG
4040414	NM_003386.1	ZAN	5.2	up	-1	5.2	ZAN	5.4	down	18.9	3.5	-1	5.2	18.9	3.5	-0.903677	1.47483	3.33664	0.903677	ZAN	7455	Homo sapiens zonadhesin (ZAN), transcript variant 3, mRNA.	GO:0016337|GO:0008037|GO:0007339|GO:0016337|GO:0008037|GO:0007339	GO:0005886|GO:0016021|GO:0016324|GO:0005886|GO:0016021|GO:0016324	GO:0005515|GO:0005515	chr7	100229531	100229681	CTCCCCTGGCTGACTGTGGCTGCACCAGCAATGGCATCTACTACCAGCTG
4850253	NM_001243.3	TNFRSF8	5.16216	up	3.7	19.1	TNFRSF8	26.8	down	26.8	-5.6	3.7	19.1	26.8	-5.6	-2.18885	0.17913	0.66779	-4.07637	TNFRSF8	943	Homo sapiens tumor necrosis factor receptor superfamily, member 8 (TNFRSF8), transcript variant 1, mRNA.	GO:0007165|GO:0008285|GO:0007165|GO:0008285	GO:0016020|GO:0016021|GO:0016020|GO:0016021	GO:0004888|GO:0005515|GO:0004888|GO:0005515	chr1	12126525	12126574	CCGCTCAGATGTTTTGGGGAAAGTTGGAGAAGCCGTGGCCTTGCGAGAGG
1260301	NM_181539.3	KRT26	10.2	up	0.2	10.2	KRT26	17.5	down	17.5	-6.7	0.2	10.2	17.5	-6.7	-2.85216	0.498338	1.27712	-2.85216	KRT26	353288	Homo sapiens keratin 26 (KRT26), mRNA.		GO:0005882	GO:0005198	chr17	36176363	36176412	GGTTGAGGAACTGGATCAAATTGGCAATCTCCTTTCACTGAGAGTCCACT
2340563	NM_001037131.1	CENTG2	8.73684	up	1.9	16.6	CENTG2	11.4	down	11.4	-3.9	1.9	16.6	11.4	-3.9	-2.4995	0.627612	0.0854621	-3.4255	CENTG2	116987	Homo sapiens centaurin, gamma 2 (CENTG2), transcript variant 1, mRNA.				chr2	236697446	236697495	CTGTCCAGGAGAAACAATAACCGGAACAACAGCAGTGGGAGGGTGCCCAC
6650131	NM_178493.3	NOTUM	5.46154	up	2.6	14.2	NOTUM	22.6	down	22.6	0.4	2.6	14.2	22.6	0.4	-1.38421	1.0651	1.73553	-2.76272	NOTUM	147111	Homo sapiens notum pectinacetylesterase homolog (Drosophila) (NOTUM), mRNA.				chr17	77504110	77504159	AGTGAGCTGCTGGGGATGCTGAGCAACGGAAGCTAGGCAGACTGTCTGGA
2570722	NM_021139.1	UGT2B4	6	up	-0.6	6	UGT2B4	10.9	down	10.9	-2.7	-0.6	6	10.9	-2.7	-0.0687518	2.51621	3.3775	-0.0687518	UGT2B4	7363	Homo sapiens UDP glucuronosyltransferase 2 family, polypeptide B4 (UGT2B4), mRNA.	GO:0006805|GO:0006711|GO:0008152	GO:0005792|GO:0005783|GO:0016021|GO:0016020	GO:0015020	chr4	70380909	70380958	GAAGGGGAAAAGAGATTAATTACGTCTGAGGCTGGAAGCTGGGAAACCCA
1770497	NM_001926.2	DEFA6	5.8	up	-11	5.8	DEFA6	8.8	down	8.8	-14.1	-11	5.8	8.8	-14.1	-0.792481	1.74357	2.34502	-0.792481	DEFA6	1671	Homo sapiens defensin, alpha 6, Paneth cell-specific (DEFA6), mRNA.	GO:0006805|GO:0019735	GO:0005576		chr8	6769819	6770783	AGAGCTTTGGGCTCAACAAGGGCTTTCACTTGCCATTGCAGAAGGTCCTG
7320270	NM_013364.2	PNMA3	6.66667	up	1.2	8	PNMA3	8.5	down	8.5	-10.1	1.2	8	8.5	-10.1	-2.2094	0.527571	0.615034	-2.47243	PNMA3	29944	Homo sapiens paraneoplastic antigen MA3 (PNMA3), mRNA.			GO:0003676	chrX	151979356	151979405	CGGGACCTGTGTGGGACCTGTGTCCTGTGGTGGCCGTTTGCAGTTTCTCT
1980519	NM_001004713.1	OR1I1	18.1	up	-3.5	18.1	OR1I1	12	down	12	-5.1	-3.5	18.1	12	-5.1	-1.79248	2.38544	1.79248	-1.79248	OR1I1	126370	Homo sapiens olfactory receptor, family 1, subfamily I, member 1 (OR1I1), mRNA.	GO:0007186|GO:0007165	GO:0016021|GO:0016020	GO:0004984|GO:0004872	chr19	15059889	15059938	CCATCCCCTACCCTGGAGGAGTTCAGAGTCTAGCTGGGAACAGAGACATG
6060070	NM_001040168.1	LFNG	13.8	up	-4.4	13.8	LFNG	14.6	down	14.6	-3.2	-4.4	13.8	14.6	-3.2	0	3.7866	3.8679	0	LFNG	3955	Homo sapiens LFNG O-fucosylpeptide 3-beta-N-acetylglucosaminyltransferase (LFNG), transcript variant 2, mRNA.	GO:0007275|GO:0007275	GO:0016020|GO:0016021|GO:0005576|GO:0016020|GO:0016021|GO:0005576	GO:0016757|GO:0016757	chr7	2535252	2535301	CCACTGCAGCTGGTCCCAGCCCCTGCAGAGATCCAGACGCTTGTTTTTTA
6200097	NM_144632.2	FLJ30294	22.3	up	-0.6	22.3	FLJ30294	24.8	down	24.8	0	-0.6	22.3	24.8	0	-1.51781	2.96116	3.11446	-1.51781	FLJ30294	130827	Homo sapiens transmembrane protein 182 (TMEM182), mRNA.				chr2	102799989	102800038	CCAGCAACCCTCTGAAGGAATGAAGGAGAGTTGTGATTGCTATGTCAATG
1990333	NM_004319.1	ASTN	6	up	-2	6	ASTN	10.7	down	10.7	-2.3	-2	6	10.7	-2.3	-0.600817	1.98415	2.81872	-0.600817	ASTN	460	Homo sapiens astrotactin 1 (ASTN1), transcript variant 1, mRNA.	GO:0007158|GO:0007155|GO:0016477	GO:0016020|GO:0016021	GO:0005515	chr1	175097111	175097160	CAACACTCTCCCAGCTCCCATGTCCCCAAGACCTCTGGAGTTTCCTCTTG
2000066	NM_134259.1	TBL1Y	5.2	up	-6.3	5.2	TBL1Y	8.7	down	8.7	-3.5	-6.3	5.2	8.7	-3.5	0	2.37851	3.12102	0	TBL1Y	90665	Homo sapiens transducin (beta)-like 1Y-linked (TBL1Y), transcript variant 3, mRNA.	GO:0006512|GO:0006355|GO:0006350	GO:0005634		chrY	7019649	7019698	CTTGTGTTAGAGTATATTCTGAAACCAACTTGTCCCAGGCCACAGGAGTG
610274	NM_004744.3	LRAT	6.9	up	-8	6.9	LRAT	10.8	down	10.8	-11.3	-8	6.9	10.8	-11.3	-2.53969	0.246907	0.89327	-2.53969	LRAT	9227	Homo sapiens lecithin retinol acyltransferase (phosphatidylcholine--retinol O-acyltransferase) (LRAT), mRNA.	GO:0007601	GO:0016020|GO:0016021|GO:0005783	GO:0008415|GO:0016740|GO:0047173	chr4	155892950	155892999	ACATGGAACTGCACAGGGCATTCAGGCAAGTGCAAGTGGTTCAGGGGCCA
7320632	NM_170604.1	RASGRP4	8.3	up	-0.4	8.3	RASGRP4	11.7	down	11.7	-4.7	-0.4	8.3	11.7	-4.7	-1.32768	1.72544	2.22076	-1.32768	RASGRP4	115727	Homo sapiens RAS guanyl releasing protein 4 (RASGRP4), transcript variant 4, mRNA.	GO:0007169|GO:0051056|GO:0007264|GO:0016049|GO:0008277|GO:0007202|GO:0008283|GO:0009991|GO:0046579|GO:0007169|GO:0051056|GO:0007264|GO:0016049|GO:0008277|GO:0007202|GO:0008283|GO:0009991|GO:0046579	GO:0005622|GO:0005625|GO:0005886|GO:0005624|GO:0005622|GO:0005625|GO:0005886|GO:0005624	GO:0005509|GO:0019992|GO:0005088|GO:0030742|GO:0005085|GO:0005509|GO:0019992|GO:0005088|GO:0030742|GO:0005085	chr19	43592569	43593407	GACCCAGACTGAATCCCCACACCCTTCCTGGGAAACAGATACGGTCCCCT
6200689	NM_001080409.1	ZNF99	6.16	up	2.5	15.4	ZNF99	18.4	down	18.4	-2.5	2.5	15.4	18.4	-2.5	-0.645802	1.97713	2.2339	-1.96773	ZNF99	7652	Homo sapiens zinc finger protein 99 (ZNF99), mRNA.		GO:0005634|GO:0005622	GO:0008270|GO:0046872|GO:0003676				CCATCTTTCAGCCCTTACTAAACATAAGATAATTCATACTGGGGAGAAGC
7650296	NM_133505.2	DCN	6.59574	up	2856.3	18839.4	DCN	9.73585	down	51.6	5.3	2856.3	18839.4	51.6	5.3	0.391646	3.11318	-5.39899	-8.68229	DCN	1634	Homo sapiens decorin (DCN), transcript variant C, mRNA.		GO:0005578	GO:0016740	chr12	90063978	90064027	CAGCCATCCACCTTCAGATGTGTCTACGTGCGCTCTGCCATTCAACTCGG
1450433	NM_133266.1	SHANK2	7.8	up	0.3	7.8	SHANK2	10.1	down	10.1	-1.6	0.3	7.8	10.1	-1.6	-2.19616	0.767315	1.14012	-2.19616	SHANK2	22941	Homo sapiens SH3 and multiple ankyrin repeat domains 2 (SHANK2), transcript variant 2, mRNA.	GO:0007242		GO:0030160|GO:0005515	chr11	70016157	70016206	GAGATAGTCCCGGCCTCCAAGCCCTCCCGCGCTGCTGAGAACATGGCTGT
2680332	NM_022097.1	LOC63928	13.8	up	-4.1	13.8	LOC63928	5.45946	down	20.2	3.7	-4.1	13.8	20.2	3.7	-3.35685	0.429749	0.979436	-1.46932	LOC63928	63928	Homo sapiens hepatocellular carcinoma antigen gene 520 (LOC63928), mRNA.			GO:0005509	chr16	23677496	23677545	CCTAGAGCCAGGGAAATAAGGTCTGAGGATTCAGGATGGGGTGAAAGGTG
3440253	NM_003081.2	SNAP25	9.68915	up	34.1	330.4	SNAP25	8.1	down	8.1	-2.3	34.1	330.4	8.1	-2.3	-0.026989	3.24938	-2.10077	-5.11869	SNAP25	6616	Homo sapiens synaptosomal-associated protein, 25kDa (SNAP25), transcript variant 1, mRNA.	GO:0016081|GO:0007269|GO:0050796|GO:0007268|GO:0001504	GO:0045202|GO:0019717	GO:0005515	chr20	10235988	10236037	CCTCCTGTCTCCTCTGTCAGTTTGTGAAGTGATTGACATTTTGTAGCTAG
1780600	NM_000733.2	CD3E	6.2	up	-7.3	6.2	CD3E	5.2	down	5.2	-1.1	-7.3	6.2	5.2	-1.1	-1.80559	0.826682	0.572926	-1.80559	CD3E	916	Homo sapiens CD3e molecule, epsilon (CD3-TCR complex) (CD3E), mRNA.	GO:0042102|GO:0007172|GO:0007186|GO:0042981|GO:0006461	GO:0005886|GO:0009897|GO:0005887	GO:0042608|GO:0004888|GO:0019901|GO:0046982|GO:0017124|GO:0030159	chr11	117691843	117691892	CTATCGCCGTCCCCTTTTGCAGCCCTCTCTGGGGATGGACTGGGTAAATG
2900056	NM_004110.3	FDXR	10.7	up	-0.5	10.7	FDXR	8.8	down	8.8	0.5	-0.5	10.7	8.8	0.5	-3.72317	-0.303631	-0.585666	-3.72317	FDXR	2232	Homo sapiens ferredoxin reductase (FDXR), nuclear gene encoding mitochondrial protein, transcript variant 2, mRNA.	GO:0006810|GO:0006694|GO:0008203|GO:0006629|GO:0006118	GO:0005739	GO:0016491|GO:0004324				AAGGGATGAGTGTTGGGAGGGGAAGGGCTGGGTCCGTCTGAGTGGGACTT
990438	NM_005889.2	APOBEC1	12	up	-2.7	12	APOBEC1	14.4	down	14.4	0	-2.7	12	14.4	0	0	3.58496	3.848	0	APOBEC1	339	Homo sapiens apolipoprotein B mRNA editing enzyme, catalytic polypeptide 1 (APOBEC1), transcript variant 2, mRNA.	GO:0006629|GO:0006397|GO:0006381		GO:0046872|GO:0016787|GO:0008270|GO:0003723|GO:0004126	chr12	7694942	7694991	GCTGGAGGAATTTTGTCAACTACCCACCTGGGGATGAAGCTCACTGGCCA
4920079	NR_002163.2	OR7E37P	5.6	up	-9.2	5.6	OR7E37P	10.027	down	37.1	3.7	-9.2	5.6	37.1	3.7	-0.943763	1.54166	4.26958	0.943763	OR7E37P	26636	Homo sapiens olfactory receptor, family 7, subfamily E, member 37 pseudogene (OR7E37P) on chromosome 13.				chr13	40915657	40915706	ATGATGTGTCATCTTCCCCCAGAAAGGGTGCAGTGGCCTCAGTGATGTAC
1440369	NM_024539.3	RNF128	9.1	up	-3.2	9.1	RNF128	26.4	down	26.4	-0.3	-3.2	9.1	26.4	-0.3	-2.10395	1.08192	2.61852	-2.10395	RNF128	79589	Homo sapiens ring finger protein 128 (RNF128), transcript variant 2, mRNA.			GO:0008270|GO:0046872|GO:0008233|GO:0005515|GO:0008270|GO:0046872|GO:0008233|GO:0005515	chrX	105824056	105824105	AGCTTCACCAGTGGCTAATGCTATGGGAGTGGTAGGCATCCCTAAGAACA
6040647	NM_032855.2	HSH2D	13.9	up	-2.4	13.9	HSH2D	10.6	down	10.6	-4.6	-2.4	13.9	10.6	-4.6	-1.55217	2.24484	1.85382	-1.55217	HSH2D	84941	Homo sapiens hematopoietic SH2 domain containing (HSH2D), mRNA.	GO:0007242	GO:0005634		chr19	16129952	16130001	TGACCAAGGCCACAGAGCTATGGGTGTCAGCACCAGGATTTGAAGCCAGG
6330484	NM_004079.3	CTSS	7.1	up	-20.5	7.1	CTSS	8.9	down	8.9	-5.3	-20.5	7.1	8.9	-5.3	0	2.82782	3.15381	0	CTSS	1520	Homo sapiens cathepsin S (CTSS), mRNA.	GO:0006955	GO:0005576|GO:0005764	GO:0004218	chr1	148969534	148969583	GACTGTCATGTAAGAGGTGCTCTCCTGGCACCCAGAGAAAAGGAGCATCC
1240678	NM_138796.2	LOC128153	10.8947	up	1.9	20.7	LOC128153	14.5	down	14.5	0.2	1.9	20.7	14.5	0.2	-3.18877	0.256789	-0.256789	-4.11477	LOC128153	128153	Homo sapiens spermatogenesis associated 17 (SPATA17), mRNA.				chr1	216022219	216022268	CGATGAGTTAAAGTTGGCCAGAGAGGAGCTCAGAAGAGAGGAATGGCTGC
2100711	NM_000770.2	CYP2C8	11	up	-2.6	11	CYP2C8	9.5	down	9.5	-3.2	-2.6	11	9.5	-3.2	-3.35368	0.105752	-0.105752	-3.35368	CYP2C8	1558	Homo sapiens cytochrome P450, family 2, subfamily C, polypeptide 8 (CYP2C8), transcript variant Hp1-1, mRNA.	GO:0006118	GO:0016020|GO:0005792|GO:0005783	GO:0004497|GO:0005506|GO:0046872|GO:0020037|GO:0050381	chr10	96786875	96786924	GGGATTGTTTCTCTGCCACCCTCATACCAGATCTGCTTCATCCCTGTCTG
6580044	NM_015967.3	PTPN22	8.72022	up	36.1	314.8	PTPN22	120.636	down	132.7	1.1	36.1	314.8	132.7	1.1	-0.632017	2.49235	1.24608	-5.66844	PTPN22	26191	Homo sapiens protein tyrosine phosphatase, non-receptor type 22 (lymphoid) (PTPN22), transcript variant 1, mRNA.	GO:0007275|GO:0006470|GO:0007165		GO:0016787|GO:0004725	chr1	114158149	114158198	ATTGGCAGGTAATTGTTTTTACAAAGAATCCACCTGACTTCCCCTAATGC
7000044	NM_001033602.1	KIAA0774	7.5	up	0.5	7.5	KIAA0774	23.9	down	23.9	0.4	0.5	7.5	23.9	0.4	-3.12159	-0.214696	1.45735	-3.12159	KIAA0774	23281	Homo sapiens KIAA0774 (KIAA0774), transcript variant 1, mRNA.				chr13	28572947	28572996	ATCCAATCTCCCGAAATCTGGTCTCCGTCCTCCCGGATACTCACGTCTCC
1580280	NM_003429.1	ZNF85	16.1	up	-10.1	16.1	ZNF85	5.92046	down	156.3	26.4	-10.1	16.1	156.3	26.4	-4.37463	-0.365644	2.91354	0.347833	ZNF85	7639	Homo sapiens zinc finger protein 85 (ZNF85), mRNA.	GO:0006355|GO:0006350	GO:0005622|GO:0005634	GO:0003676|GO:0046872|GO:0008270|GO:0003700|GO:0003714	chr19	20925268	20925317	ATGTGGAAAAGCCGTTAATATCTGCTCACATCTTACTCAGCATCAGAAAG
6420008	NM_000313.1	PROS1	12.9643	up	2.8	36.3	PROS1	6.67531	down	2909.1	435.8	2.8	36.3	2909.1	435.8	-4.24265	-0.546182	5.77828	3.03944	PROS1	5627	Homo sapiens protein S (alpha) (PROS1), mRNA.	GO:0007596	GO:0005576	GO:0004866|GO:0005509	chr3	95074739	95074788	GGAGGTAAGATTGCCACGTGCCTGCTGGTACTGTGATGCATTTCAAGTGG
4670056	NM_001011547.1	SLC5A9	14.2	up	-6.8	14.2	SLC5A9	8.6	down	8.6	-4.1	-6.8	14.2	8.6	-4.1	-2.15299	1.67483	0.951351	-2.15299	SLC5A9	200010	Homo sapiens solute carrier family 5 (sodium/glucose cotransporter), member 9 (SLC5A9), mRNA.	GO:0006811|GO:0006814	GO:0016020|GO:0016021	GO:0005215	chr1	48486565	48486614	CTGTATTTAAGGGTAAGCCCCACAGCGGGCAGCACAAACAGCCTGGGAGC
4050079	NM_198289.1	CIDEA	9	up	-4.7	9	CIDEA	19.2	down	19.2	1	-4.7	9	19.2	1	-3.05739	0.112533	1.20564	-3.05739	CIDEA	1149	Homo sapiens cell death-inducing DFFA-like effector a (CIDEA), transcript variant 2, mRNA.	GO:0006309|GO:0006915|GO:0008630|GO:0006309|GO:0006915|GO:0008630	GO:0005622|GO:0005622	GO:0005515|GO:0005515	chr18	12244793	12244842	GAACCCCGAGCAAAGCTTCCGCGATGCGAGGGGACCGGGCTTCTGGGGGT
540753	NM_001025463.1	LOC284751	8.1	up	-9.9	8.1	LOC284751	5.9	down	5.9	-10.9	-9.9	8.1	5.9	-10.9	0	3.01792	2.56072	0	LOC284751	284751	Homo sapiens hypothetical protein LOC284751 (LOC284751), mRNA.				chr20	48361770	48361819	GCTTCTCATCTTTGGAGTTGAGCTGCAGGCTGGAGACCTGGAAGGCCCTC
5420435	NM_004571.3	PKNOX1	7.1	up	0.9	7.1	PKNOX1	7.4	down	7.4	-2.7	0.9	7.1	7.4	-2.7	-1.41391	1.41391	1.47362	-1.41391	PKNOX1	5316	Homo sapiens PBX/knotted 1 homeobox 1 (PKNOX1), transcript variant 1, mRNA.	GO:0006355	GO:0005634	GO:0003704|GO:0003700	chr21	43324510	43324559	CACGGGTTGGCTCCTACGTTTGCGTTTGTGGCTGGTCTCCTGGTGTCAGT
5550176	NM_152770.1	MGC35043	7.3	up	-1.2	7.3	MGC35043	11.1667	down	53.6	4.8	-1.2	7.3	53.6	4.8	-2.56547	0.302431	3.1787	-0.302431	MGC35043	255119	Homo sapiens chromosome 4 open reading frame 22 (C4orf22), mRNA.				chr4	82085105	82103731	TGTGGACCCAAAGGCGCAGCCAGGTGACAACTCTACTAGAATCACTATCC
450333	NM_212533.1	ABCA2	6.1	up	-6.3	6.1	ABCA2	5.7	down	5.7	-0.7	-6.3	6.1	5.7	-0.7	-1.25548	1.35333	1.25548	-1.25548	ABCA2	20	Homo sapiens ATP-binding cassette, sub-family A (ABC1), member 2 (ABCA2), transcript variant 2, mRNA.	GO:0006629|GO:0008203|GO:0006810	GO:0005765|GO:0016020|GO:0016021|GO:0043190	GO:0005524|GO:0000166|GO:0016887|GO:0042626	chr9	139043142	139043191	ACCGCCTGATCCCGAACTCCCTGTGCAGAGACCAGACTCGCCCGAATATG
1230524	NM_152996.1	ST6GALNAC3	5	up	1.4	7	ST6GALNAC3	9.83333	down	11.8	1.2	1.4	7	11.8	1.2	-2.30102	0.02091	0.77427	-2.52341	ST6GALNAC3	256435	Homo sapiens ST6 (alpha-N-acetyl-neuraminyl-2,3-beta-galactosyl-1, 3)-N-acetylgalactosaminide alpha-2,6-sialyltransferase 3 (ST6GALNAC3), mRNA.	GO:0006486	GO:0030173|GO:0016020|GO:0016021	GO:0008373	chr1	76868988	76869037	TCACACCCATAAACATTACTAAGCCCCAGTTCTATCGTTGGAAGGAGTTG
2570538	NM_007084.2	SOX21	14.3771	up	35.8	514.7	SOX21	5.10526	down	77.6	15.2	35.8	514.7	77.6	15.2	0.617944	4.46364	1.73404	-0.617944	SOX21	11166	Homo sapiens SRY (sex determining region Y)-box 21 (SOX21), mRNA.	GO:0006325|GO:0006350|GO:0006357	GO:0005634	GO:0003702|GO:0003700	chr13	94160236	94160285	GCATTTCTCTCCCAAGTTGAGCTGGTTTAATGTGTTTTGGATTTCCCTCC
# Notes : EL1 : HMLER 5fold up
#description: ( Source Experiment : HMLER+ATCC
#Source Organism : Homo sapiens
#Source Technology : Illumina.SingleColor.HumanRef-8_V3_0_R0_11282963_A)
# EL2 : MB231 5fold down
#description: ( Source Experiment : HMLER+ATCC
#Source Organism : Homo sapiens
#Source Technology : Illumina.SingleColor.HumanRef-8_V3_0_R0_11282963_A)
#EL1 ^ EL2
#
# Technology : Illumina.SingleColor.HumanRef-8_V3_0_R0_11282963_A
# Owner : CancerBio_1
# Created On : Thu Jun 17 11:28:16 SGT 2010
